# Supplementary material
Source: PubMed Central journal article supplement (PMC4195387)
Supplement: ja507809w_si_001.pdf [file ja507809w_si_001.pdf]

## Supplementary Information

### Heterodimetallic [LnLn'] Lanthanide Complexes: Towards a Chemical Design of 2-Qubit Molecular Spin Quantum Gates

David Aguilà, Leoní A. Barrios, Verónica Velasco, Olivier Roubeau, Ana Repollés, Pablo J. Alonso, Javier Sesé, Simon J. Teat, Fernando Luis\* and Guillem Aromí\*

| Table of contents                                                                                                                                                                                                                                           | page number |
|-------------------------------------------------------------------------------------------------------------------------------------------------------------------------------------------------------------------------------------------------------------|-------------|
| • Spin Hamiltonian for a pair of weakly coupled rare-earth Kramers ions                                                                                                                                                                                     | S3          |
| • Figure S1; Schematic representation of the structure of complexes [LnLn'(HL) <sub>2</sub> (H <sub>2</sub> L)(NO <sub>3</sub> )(py)(H <sub>2</sub> O)] ( <b>1</b> and <b>4</b> to <b>7</b> )                                                               | S5          |
| • Figure S2; Positive ESI MS of [CeEr(HL) <sub>2</sub> (H <sub>2</sub> L)(NO <sub>3</sub> )(py)(H <sub>2</sub> O)] ( <b>1</b> ).                                                                                                                            | S6          |
| • Figure S3; Comparison of two representative ESI peaks of [CeEr(HL) <sub>2</sub> (H <sub>2</sub> L)(NO <sub>3</sub> )(py)(H <sub>2</sub> O)] ( <b>1</b> ), with simulations.                                                                               | S6          |
| • Figure S4; Positive ESI MS of [LaEr(HL) <sub>2</sub> (H <sub>2</sub> L)(NO <sub>3</sub> )(py)(H <sub>2</sub> O)] ( <b>4</b> ).                                                                                                                            | S7          |
| • Figure S5; Comparison of two representative ESI peaks of [LaEr(HL) <sub>2</sub> (H <sub>2</sub> L)(NO <sub>3</sub> )(py)(H <sub>2</sub> O)] ( <b>4</b> ), with simulations.                                                                               | S7          |
| • Figure S6; Positive ESI MS of [CeY(HL) <sub>2</sub> (H <sub>2</sub> L)(NO <sub>3</sub> )(py)(H <sub>2</sub> O)] ( <b>5</b> ).                                                                                                                             | S8          |
| • Figure S7; Comparison of two representative ESI peaks of [CeY(HL) <sub>2</sub> (H <sub>2</sub> L)(NO <sub>3</sub> )(py)(H <sub>2</sub> O)] ( <b>5</b> ), with simulations.                                                                                | S8          |
| • Figure S8; Heat capacity of individual qubits and estimation of the dipolar interaction between molecules.                                                                                                                                                | S9          |
| • Figure S9; Positive ESI MS of [CeY(HL) <sub>2</sub> (H <sub>2</sub> L)(NO <sub>3</sub> )(py)(H <sub>2</sub> O)] <sub>0.7</sub> [Y <sub>2</sub> (HL) <sub>2</sub> (H <sub>2</sub> L)(NO <sub>3</sub> )(py)(H <sub>2</sub> O)] <sub>0.3</sub> ( <b>6</b> ). | S10         |
| • Figure S10; Positive ESI MS of [LaY(HL) <sub>2</sub> (H <sub>2</sub> L)(NO <sub>3</sub> )(py)(H <sub>2</sub> O)] ( <b>7</b> ).                                                                                                                            | S10         |
| • Figure S11; Structure of [CeEr(HL) <sub>2</sub> (H <sub>2</sub> L)(NO <sub>3</sub> )(py)(H <sub>2</sub> O)] ( <b>1</b> ).                                                                                                                                 | S11         |
| • Figure S12; Molecular structure and hydrogen bonding in [CeEr(HL) <sub>2</sub> (H <sub>2</sub> L)(NO <sub>3</sub> )(py)(H <sub>2</sub> O)] ( <b>1</b> ).                                                                                                  | S11         |
| • Figure S13; Structure of [LaEr(HL) <sub>2</sub> (H <sub>2</sub> L)(NO <sub>3</sub> )(py)(H <sub>2</sub> O)] ( <b>4</b> ).                                                                                                                                 | S12         |
| • Figure S14; Structure of [CeY(HL) <sub>2</sub> (H <sub>2</sub> L)(NO <sub>3</sub> )(py)(H <sub>2</sub> O)] ( <b>5</b> ).                                                                                                                                  | S13         |

- Figure S15; Structure of  $[(\text{Ce}_{0.7}\text{Y}_{0.3})\text{Y}(\text{HL})_2(\text{H}_2\text{L})(\text{NO}_3)(\text{py})(\text{H}_2\text{O})]$  (**6**). S14
- Figure S16; Structure of  $[\text{LaY}(\text{HL})_2(\text{H}_2\text{L})(\text{NO}_3)(\text{py})(\text{H}_2\text{O})]$  (**7**). S15
- Figure S17; Heat capacity of coupled and individual qubits. S16
- Table S1; Crystallographic data for **1**, **4**, **5**, **6** and **7**. S17
- Table S2; Selected bond distances (Å) and angles ( $^\circ$ ) of the structures of **1**, **4**, **5**, **6** and **7**. S18

## A spin Hamiltonian for a pair of weakly coupled rare-earth Kramers ions

We propose a straightforward extension of the fictitious spin formalism, often used to describe the magnetic response of a Kramers doublet, to the case of two coupled Kramers ions. Within the lowest lying multiplet, defined by a total angular momentum  $J$ , the magnetic properties of a lanthanide ion can be described by the following Hamiltonian

$$H = \sum_p \sum_{q=-p}^{+p} B_p^q O_p^q(\mathbf{J}) - g_J \mu_B \mathbf{H} \cdot \mathbf{J} \quad (1)$$

The first term in Eq. (1) arises from the interaction of  $4f$  electrons with the crystal field and is written in terms of effective operators that involve powers of different angular momentum components. The coefficients  $B_p^q$  are the anisotropy parameters. The second term is the Zeeman interaction with a magnetic field  $\mathbf{H}$ , where  $g_J$  is an effective gyromagnetic ratio.

In the case of a Kramers ion, energy levels are, at least, doubly degenerate. If there are no additional degeneracies, the ground level defines a two-dimensional subspace. For any state  $\Phi$  of this subspace, the pair  $\{\Phi, T\Phi\}$ , where  $T$  is the time-reversal operator, defines a suitable basis, usually referred to as a Kramers conjugate state basis (KCSB). Provided that both the thermal energy  $k_B T$  and the Zeeman splitting are small enough in comparison with the crystal field splitting  $\Delta$  between the ground and first excited Kramers doublets, the magnetic response can be described with an effective  $S = 1/2$  system in a magnetic field, using the following Hamiltonian

$$H^S = \mu_B \mathbf{H} \cdot \tilde{g} \cdot \mathbf{S} \quad (2)$$

where  $\tilde{g}$  is an anisotropic  $g$ -tensor. The EPR spectrum supplies information about the principal values and principal directions of this tensor.<sup>1</sup> It is, however, important to remember that only absolute values can be obtained from conventional EPR experiments; the sign of the product of the three principal values can be determined by using a circularly polarized microwave.<sup>2</sup>

---

<sup>1</sup> Poole, C.P. Jr., Farach H. *Theory of Magnetic Resonance*. Wiley-Interscience (N.Y., 1972) chapter 6.

<sup>2</sup> Abragam A., Bleaney B. *Electron Paramagnetic Resonance of Transitions Ions*. Oxford University Press (Oxford UK, 1970), chapter 3

Let us now consider *two* lanthanide Kramers ions, (1) and (2). The Hamiltonian of the combined system is given by:

$$H = H_1 + H_2 + H_{12} \quad (3)$$

where  $H_r$  ( $r = 1, 2$ ) are the spin Hamiltonians of each of the two isolated ions

$$H_r = \sum_p \sum_{q=-p}^{+p} B_p^q(r) O_p^q(\mathbf{J}_r) - g_{J,r} \mu_B \mathbf{H} \mathbf{J}_r \quad (4)$$

and  $H_{12}$  accounts for their mutual interactions. The zeroth-order Hamiltonian corresponds to considering both systems without mutual interaction, i.e.  $H_{12} = 0$ . The zeroth-order solutions of (3) are then given by  $|\Psi\rangle = |\Phi_1\rangle \otimes |\Phi_2\rangle$ , where each  $|\Phi_r\rangle$  is solution of  $H_r |\Phi_r\rangle = E_r |\Phi_r\rangle$  ( $r = 1, 2$ ), and have energies  $E = E_1 + E_2$ . If there are no accidental degeneracies, these levels have fourfold degeneracy and admit a basis given by  $\{|\Phi_1\rangle \otimes |\Phi_2\rangle, |\Phi_1\rangle \otimes |T_2\Phi_2\rangle, |T_1\Phi_1\rangle \otimes |\Phi_2\rangle, |T_1\Phi_1\rangle \otimes |T_2\Phi_2\rangle\}$ .

Interactions split the ground level and give rise to energy eigenstates that are linear combinations of the basis states. We next consider their effect by introducing a bilinear coupling between the angular momenta of ions (1) and (2)

$$H_{12} = \mathbf{J}_1 \tilde{\mathbf{C}} \mathbf{J}_2 \quad (5)$$

where  $\tilde{\mathbf{C}}$  is a second rank tensor. This form includes a dipole-dipole interaction as well as any exchange interaction. For instance, in the case of a Heisenberg isotropic exchange  $\tilde{\mathbf{C}}$  reduces to a constant  $J_{\text{ex}}$ . If the interaction  $H_{12}$  is sufficiently weak as compared with  $H_1 + H_2$ , its effect can be treated using first-order perturbation theory within each of the subspaces associated with eigenstates of  $H_1 + H_2$ . At low enough temperatures, the magnetic properties can then be described by two coupled effective spins  $S_1 = S_2 = 1/2$ , with the correspondence  $g_{J,r} \mathbf{J}_r \rightarrow \tilde{g}_r \mathbf{S}_r$ . The effective Hamiltonian is then given by

$$H^{S_1, S_2} = \mu_B \mathbf{H} \tilde{g}_1 \mathbf{S}_1 + \mu_B \mathbf{H} \tilde{g}_2 \mathbf{S}_2 + \mathbf{S}_1 \tilde{\mathbf{D}} \mathbf{S}_2 \quad (6)$$

where  $\tilde{\mathbf{D}}$  is a coupling tensor given by

$$\tilde{\mathbf{D}} = \frac{1}{g_{J1} g_{J2}} (\tilde{g}_1 \tilde{\mathbf{C}} \tilde{g}_2) \quad (7)$$

And  $\tilde{g}_1$  and  $\tilde{g}_2$  are, respectively, the effective  $g$ -tensors for the description of the ground Kramers doublet of ions (1) and (2). In general,  $\tilde{\mathbf{D}}$  is anisotropic and

non-symmetric. It becomes symmetric if  $\tilde{C}$  is a scalar, i.e. for a Heisenberg interaction between  $\mathbf{J}_1$  and  $\mathbf{J}_2$ , and if the principal axes of  $\tilde{g}_1$  and  $\tilde{g}_2$  are collinear. A similar solution was derived previously for a particular case.<sup>3</sup> In the calculations shown in Fig. 3 of the main text, we took  $\tilde{C} = J_{12}$ , thus scalar, but considered a 70 degrees rotation of the principal axes of ion 2 around the  $\mathbf{x}_1 = \mathbf{x}_2$  axis.

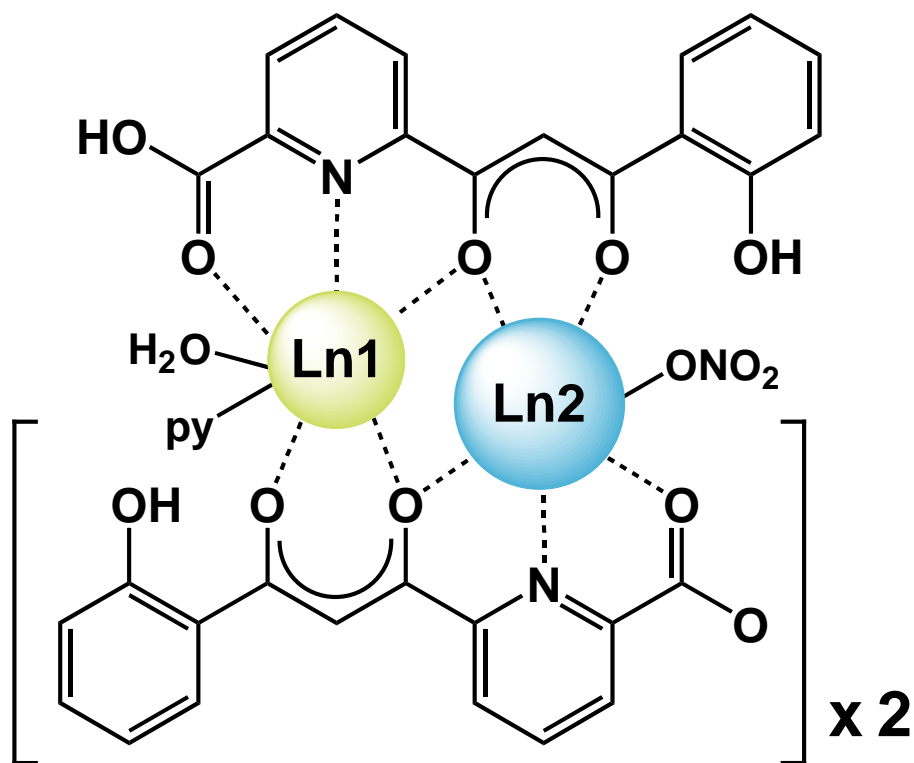

**Figure S1.** Schematic representation of the structure of complexes  $[\text{LnLn}'(\text{HL})_2(\text{H}_2\text{L})(\text{NO}_3)(\text{py})(\text{H}_2\text{O})]$  (**1** and **4** to **7**), emphasizing the difference between smaller coordinating *site 1* (two 'O,O' and one 'O,N,O' coordination pocket) and larger cavity *site 2* (one 'O,O' and two 'O,N,O' coordination pockets).

<sup>3</sup> Pali A.V., Tsukerblat B.S., Coronado E., Clemente-Juan J.M., Morrás-Almenar J.J. *Inorg. Chem.* **2003**, *42*, 2455-2458.

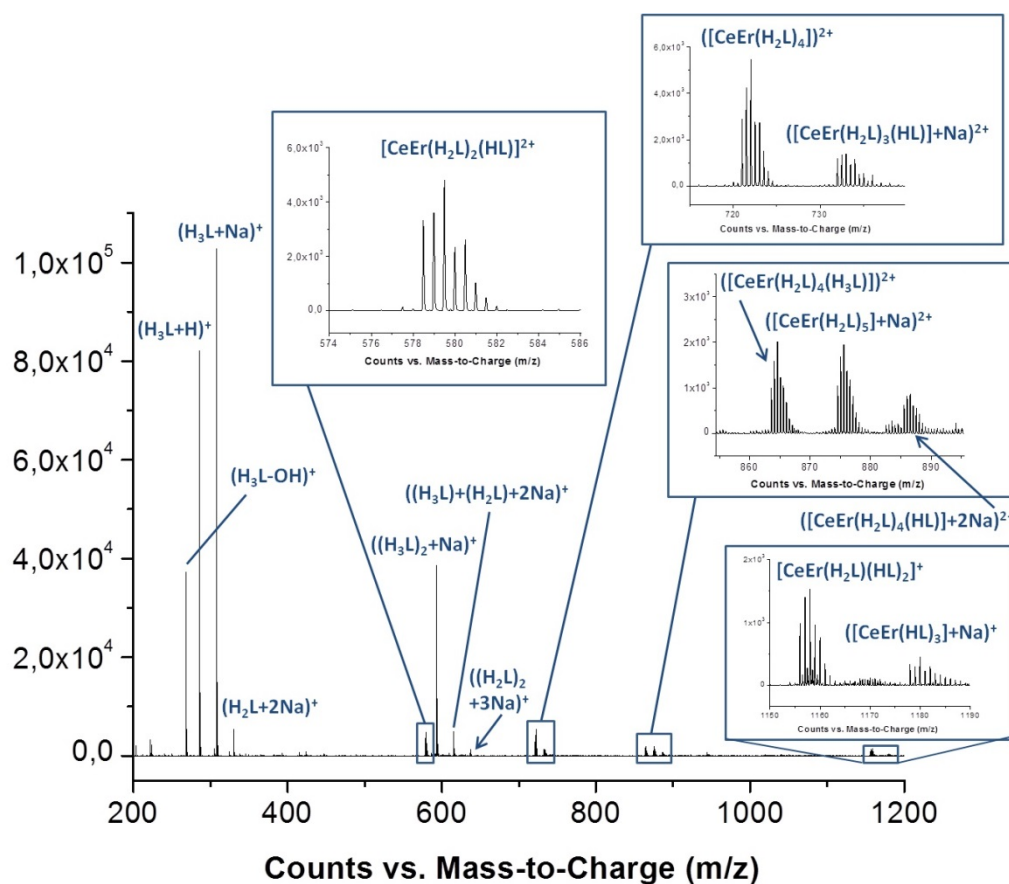

**Figure S2.** Positive-ion ESI mass spectrogram of [CeEr(HL)<sub>2</sub>(H<sub>2</sub>L)(NO<sub>3</sub>)(py)(H<sub>2</sub>O)] (1), emphasizing the heterometallic fragments.

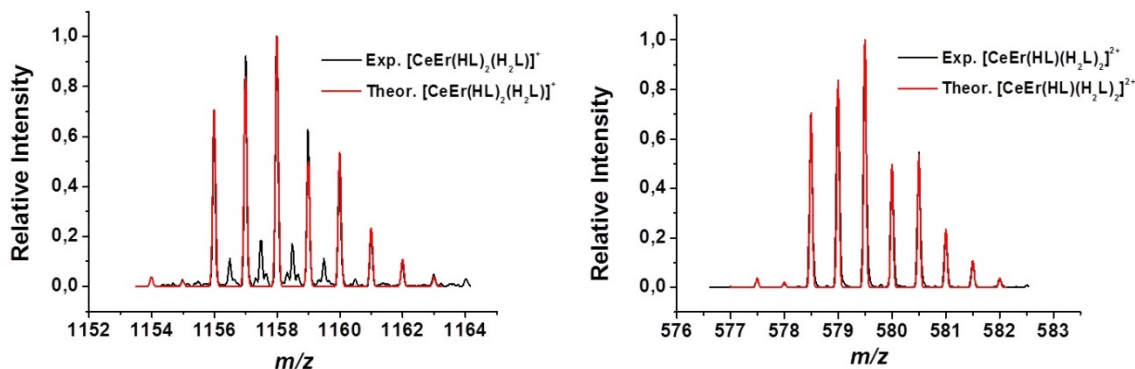

**Figure S3.** Comparison of two representative peaks from the positive-ion ESI mass spectrogram of [CeEr(HL)<sub>2</sub>(H<sub>2</sub>L)(NO<sub>3</sub>)(py)(H<sub>2</sub>O)] (1), with their simulated ones, where the isotopic distribution has been taken into account.

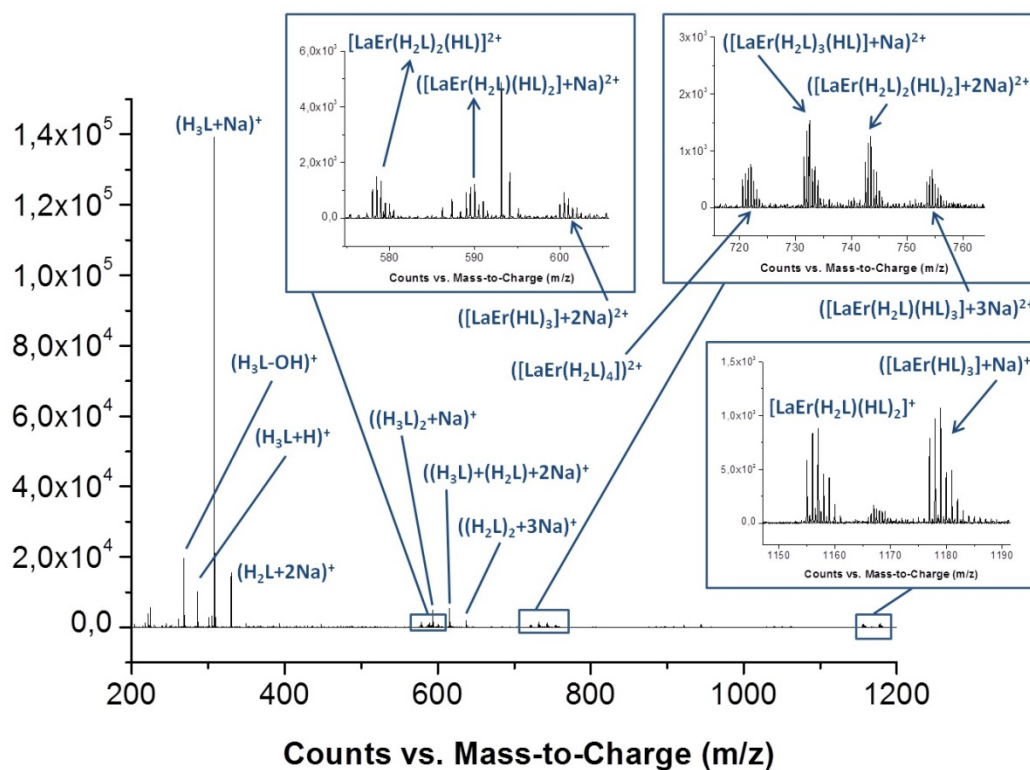

**Figure S4.** Positive-ion ESI mass spectrogram of  $[\text{LaEr}(\text{HL})_2(\text{H}_2\text{L})(\text{NO}_3)(\text{py})(\text{H}_2\text{O})]$  (**4**), emphasizing the heterometallic fragments.

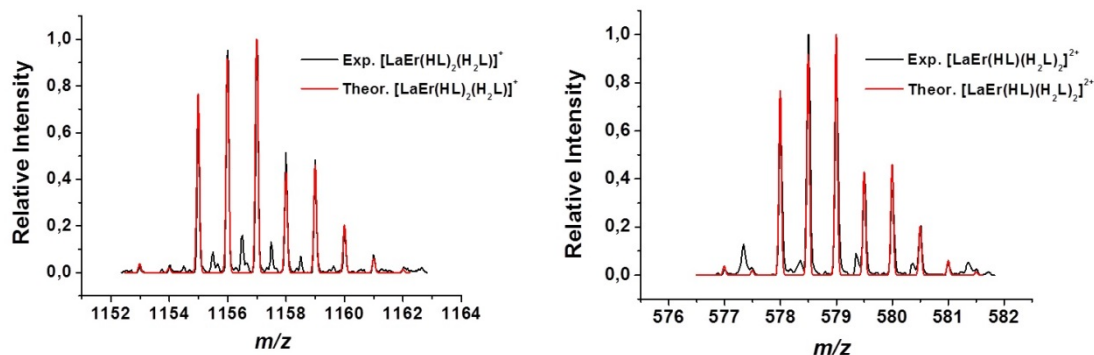

**Figure S5.** Comparison of two representative peaks from the positive-ion ESI mass spectrogram of  $[\text{LaEr}(\text{HL})_2(\text{H}_2\text{L})(\text{NO}_3)(\text{py})(\text{H}_2\text{O})]$  (**4**), with their simulated ones, where the isotopic distribution has been taken into account.

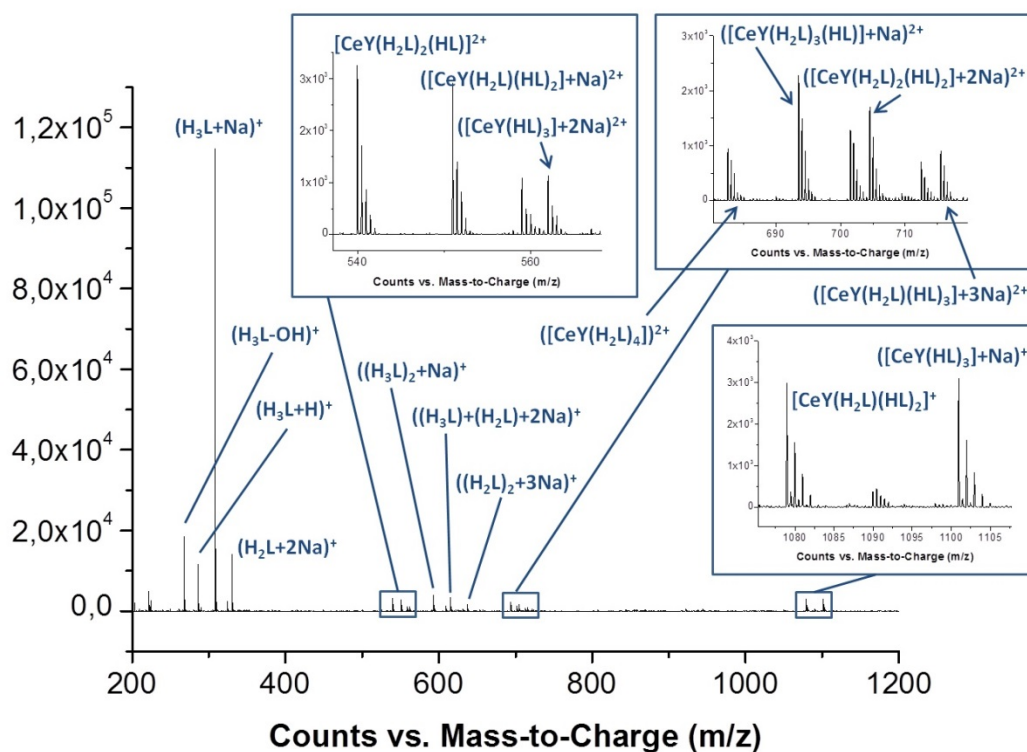

**Figure S6.** Positive-ion ESI mass spectrogram of  $[\text{CeY}(\text{HL})_2(\text{H}_2\text{L})(\text{NO}_3)(\text{py})(\text{H}_2\text{O})]$  (**5**), emphasizing the heterometallic fragments.

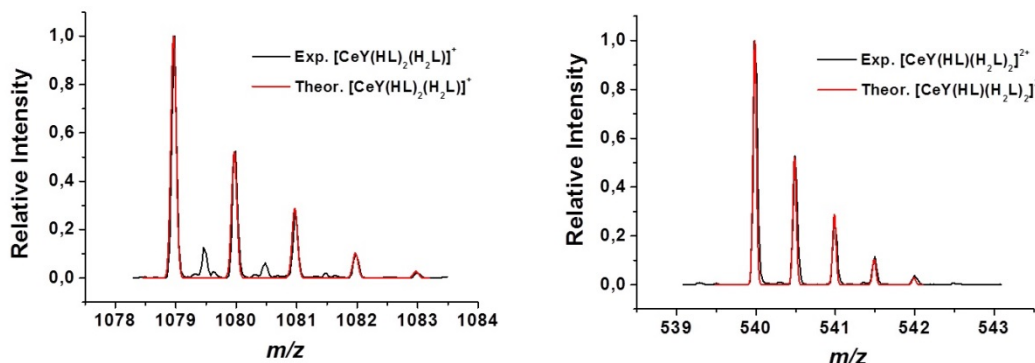

**Figure S7.** Comparison of two representative peaks from the positive-ion ESI mass spectrogram of  $[\text{CeY}(\text{HL})_2(\text{H}_2\text{L})(\text{NO}_3)(\text{py})(\text{H}_2\text{O})]$  (**5**), with their simulated ones, where the isotopic distribution has been taken into account.



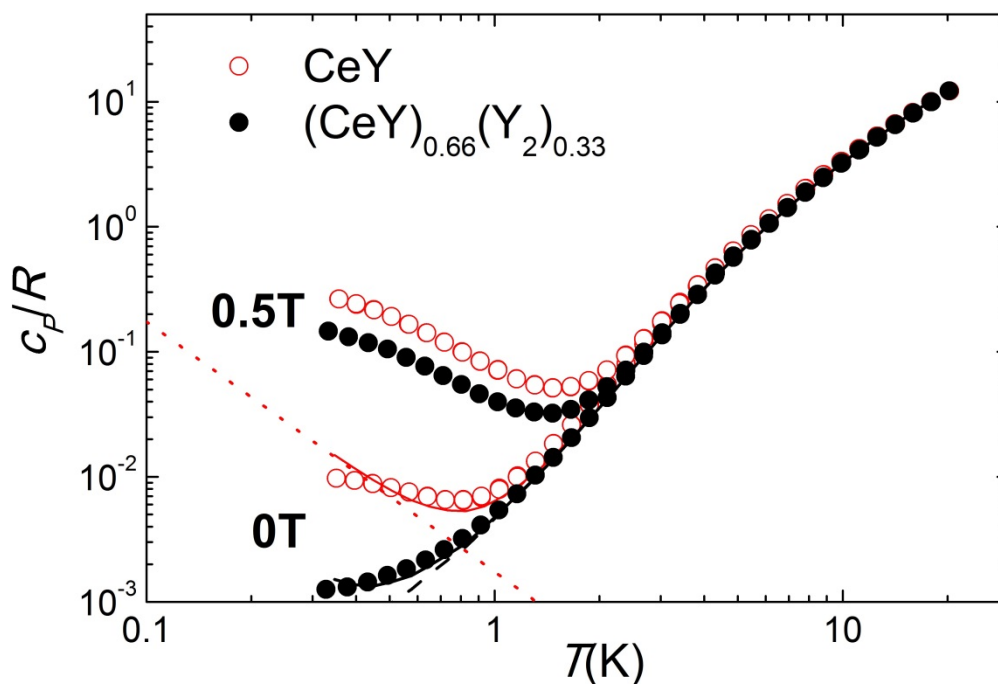

**Figure S8. Heat capacity of individual qubits.** Specific heat data of powder samples of pure [CeY] (complex **5**) and magnetically diluted [CeY]<sub>0.7</sub>[Y<sub>2</sub>]<sub>0.3</sub> (complex **6**) measured at zero field and under an applied magnetic field  $\mu_0 H = 0.5$  T. The specific heat of the diamagnetic complex [LaY] is also shown, as it provides the contribution  $c_{\text{att}}$  of vibrational modes to  $c_p$ . The dashed line is a

high temperature series  $\frac{c_{\text{dipolar}}}{R} \approx \frac{\mu_{\text{eff}}^2 \langle H_{\text{dip}}^2 \rangle}{2(k_{\text{B}} T)^2}$ , where  $\mu_{\text{eff}} = 1.9 \mu_{\text{B}}$  is the low- $T$

effective magnetic moment extracted from the equilibrium susceptibility, and  $\langle H_{\text{dip}}^2 \rangle$  is the average square dipolar magnetic field seen by each molecule. We find  $\langle H_{\text{dip}}^2 \rangle \approx (45 \text{ mT})^2$  and  $\langle H_{\text{dip}}^2 \rangle \approx (15 \text{ mT})^2$  for, respectively, pure [CeY] and [CeY]<sub>0.7</sub>[Y<sub>2</sub>]<sub>0.3</sub>. For magnetic fields much stronger than the typical  $H_{\text{dip}}$ , specific heat curves measured on samples with different concentrations of spins simply scale with  $x$  (molar fraction of magnetic molecules), showing that the effect of intermolecular couplings becomes then negligible.

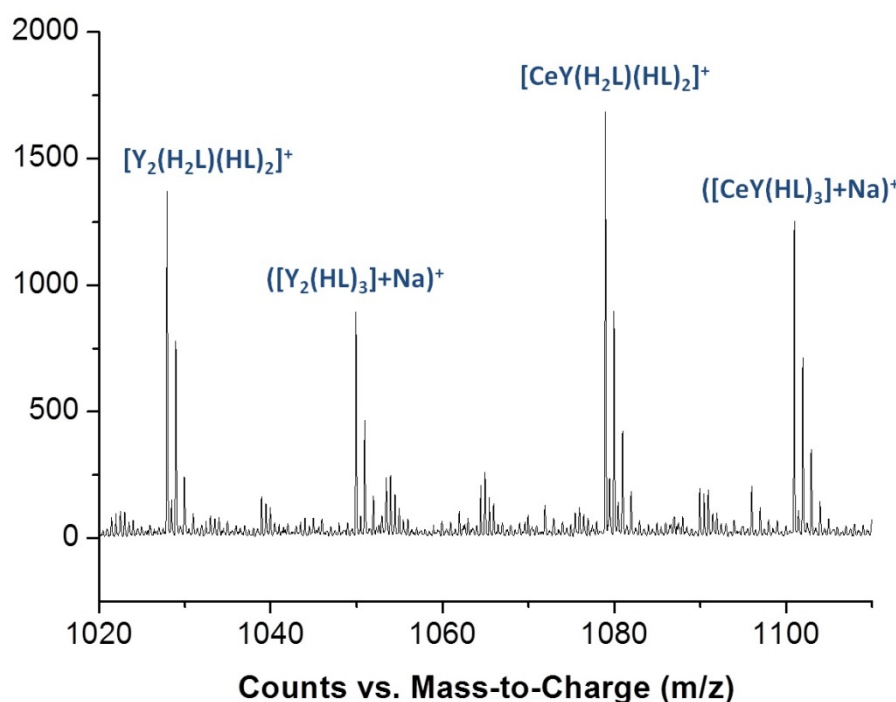

**Figure S9.** Representative region of the positive-ion ESI mass spectrogram of  $[\text{CeY}(\text{HL})_2(\text{H}_2\text{L})(\text{NO}_3)(\text{py})(\text{H}_2\text{O})]_{0.7}[\text{Y}_2(\text{HL})_2(\text{H}_2\text{L})(\text{NO}_3)(\text{py})(\text{H}_2\text{O})]_{0.3}$  (**6**), showing fragments of the  $[\text{Y}_2]$  and the  $[\text{CeY}]$  species, while the  $[\text{Ce}_2]$  complex could not be observed.

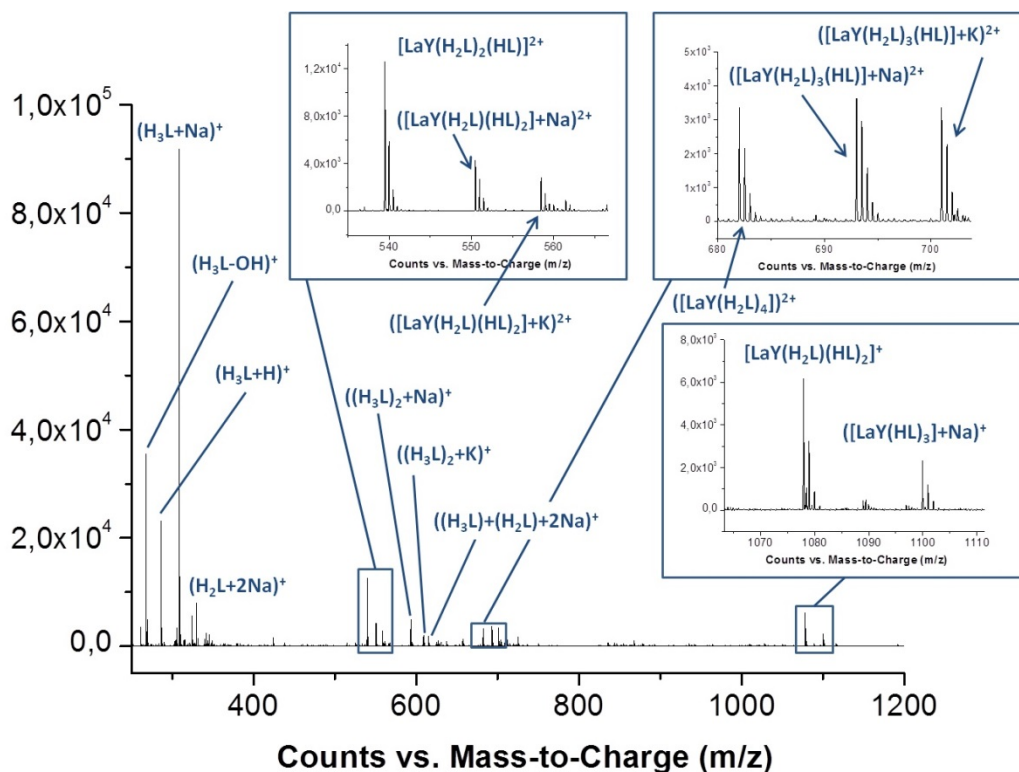

**Figure S10.** Positive-ion ESI mass spectrogram of  $[\text{LaY}(\text{HL})_2(\text{H}_2\text{L})(\text{NO}_3)(\text{py})(\text{H}_2\text{O})]$  (**7**), emphasizing the heterometallic fragments.

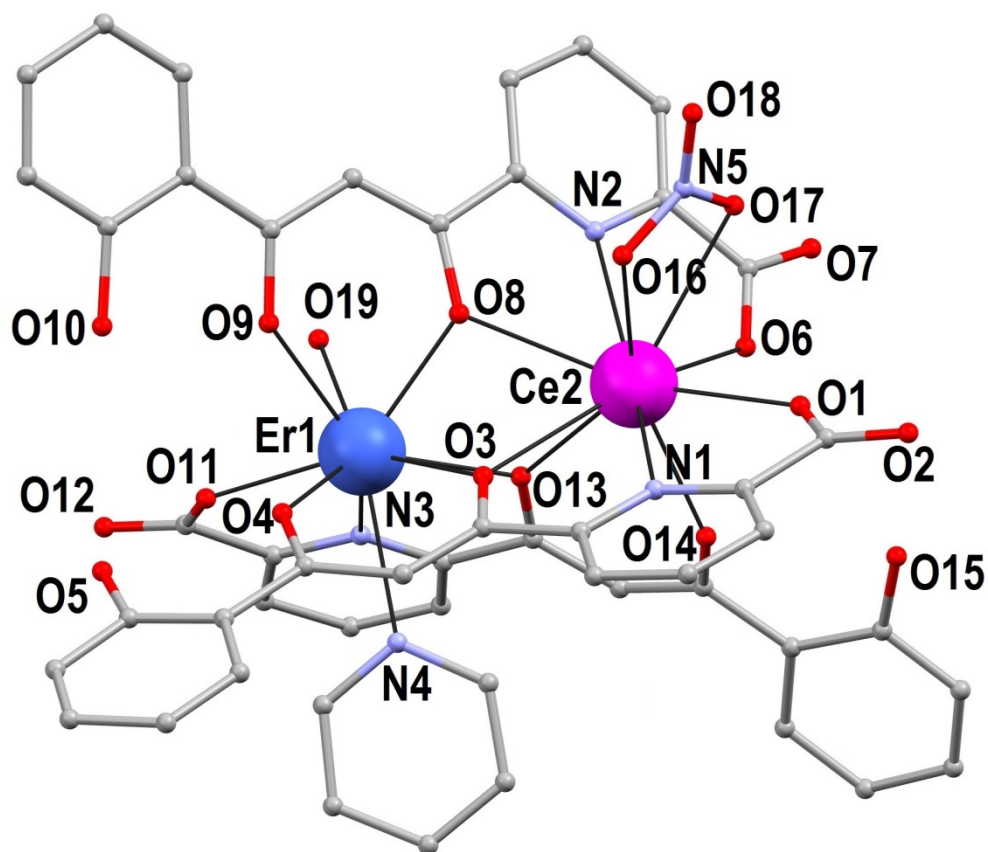

**Figure S11.** Representation of the molecular structure of  $[\text{CeEr}(\text{HL})_2(\text{H}_2\text{L})(\text{NO}_3)(\text{py})(\text{H}_2\text{O})]$  (**1**). Only heteroatoms are labelled. Carbon atoms are in grey. Hydrogen atoms are not shown for clarity.

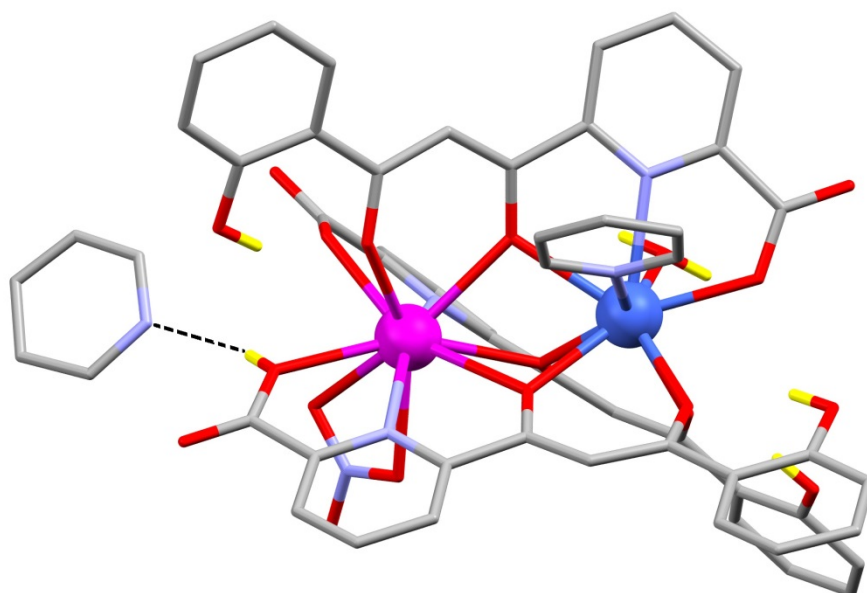

**Figure S12.** Representation of  $[\text{CeEr}(\text{HL})_2(\text{H}_2\text{L})(\text{NO}_3)(\text{py})(\text{H}_2\text{O})]$  (**1**) emphasizing the H-bond (dashed line) formed between one molecule of pyridine and the protonated carboxylate moiety from the  $\text{H}_2\text{L}^-$  ligand.

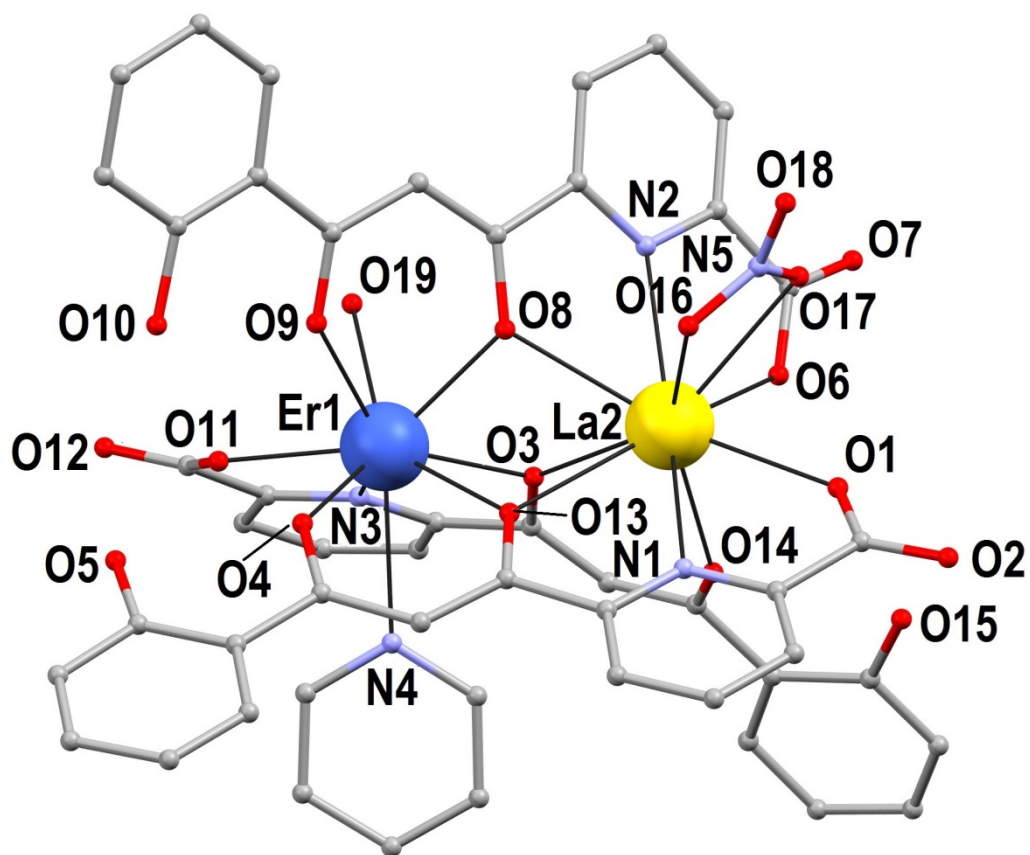

**Figure S13.** Representation of the molecular structure of  $[\text{LaEr}(\text{HL})_2(\text{H}_2\text{L})(\text{NO}_3)(\text{py})(\text{H}_2\text{O})]$  (**4**). Only heteroatoms are labelled. Carbon atoms are in grey. Hydrogen atoms are not shown for clarity.

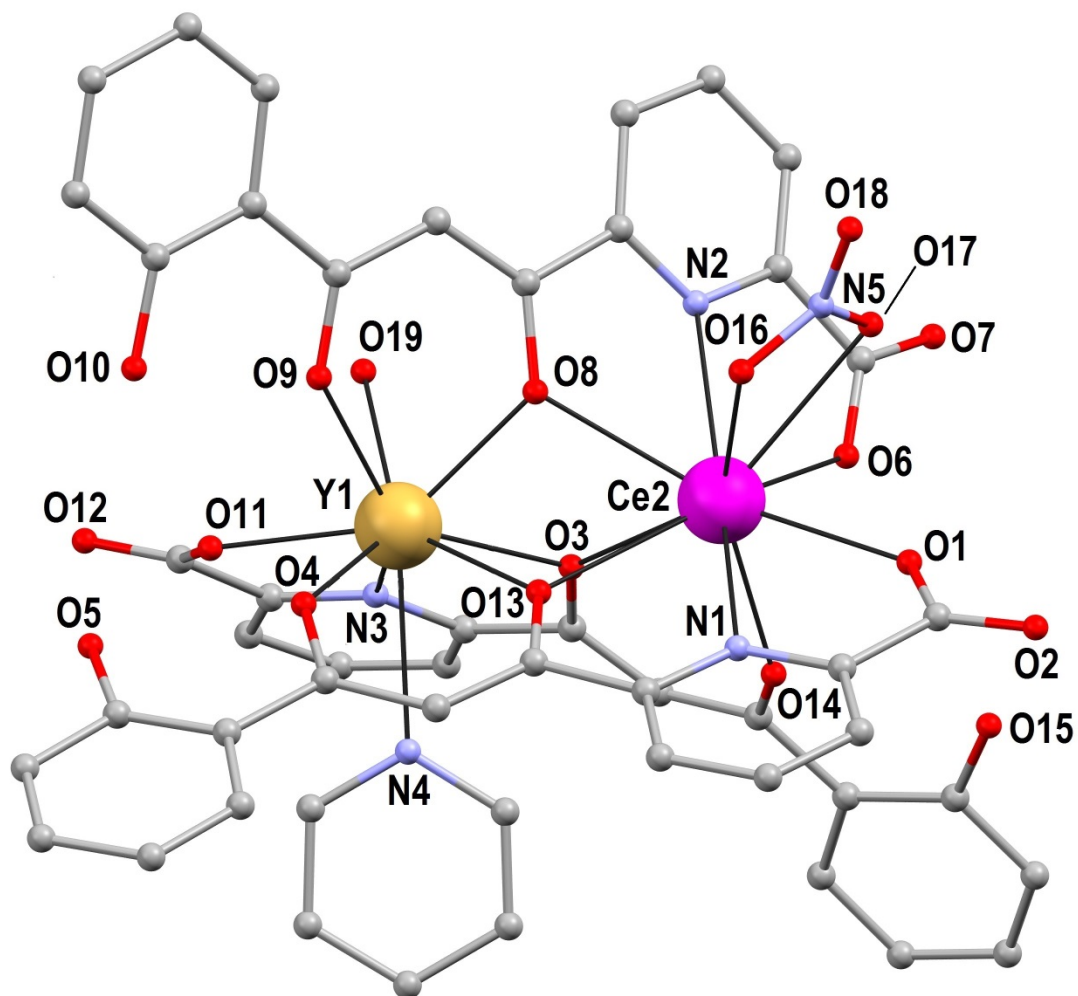

**Figure S14.** Representation of the molecular structure of  $[\text{CeY}(\text{HL})_2(\text{H}_2\text{L})(\text{NO}_3)(\text{py})(\text{H}_2\text{O})]$  (**5**). Only heteroatoms are labelled. Carbon atoms are in grey. Hydrogen atoms are not shown for clarity.

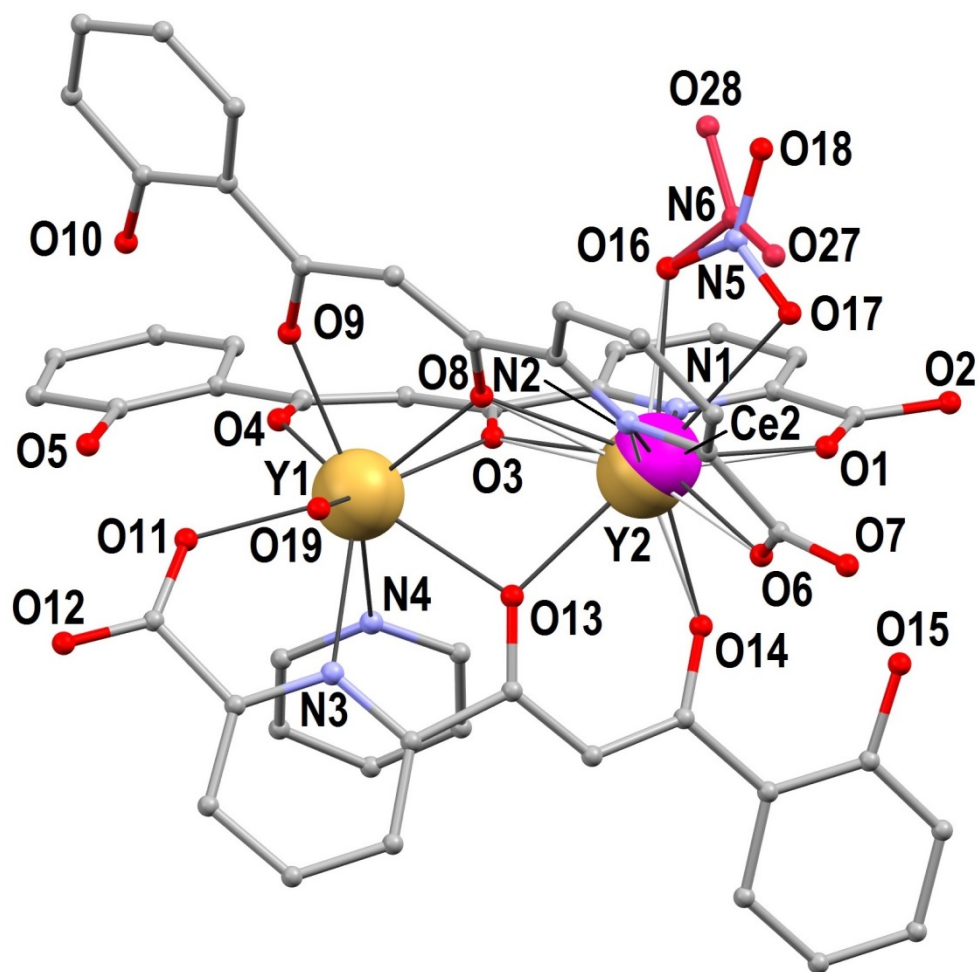

**Figure S15.** Representation of the molecular structure of  $[(\text{Ce}_{0.7}\text{Y}_{0.3})\text{Y}(\text{HL})_2(\text{H}_2\text{L})(\text{NO}_3)(\text{py})(\text{H}_2\text{O})]$  (**6**). The both atoms occupying the position of Ln2 (either Ce2 or Y2) are shown as well as both positions of  $\text{NO}_3^-$  corresponding to each of these occupations. Only heteroatoms are labelled. Carbon atoms are in grey. Hydrogen atoms are not shown for clarity.

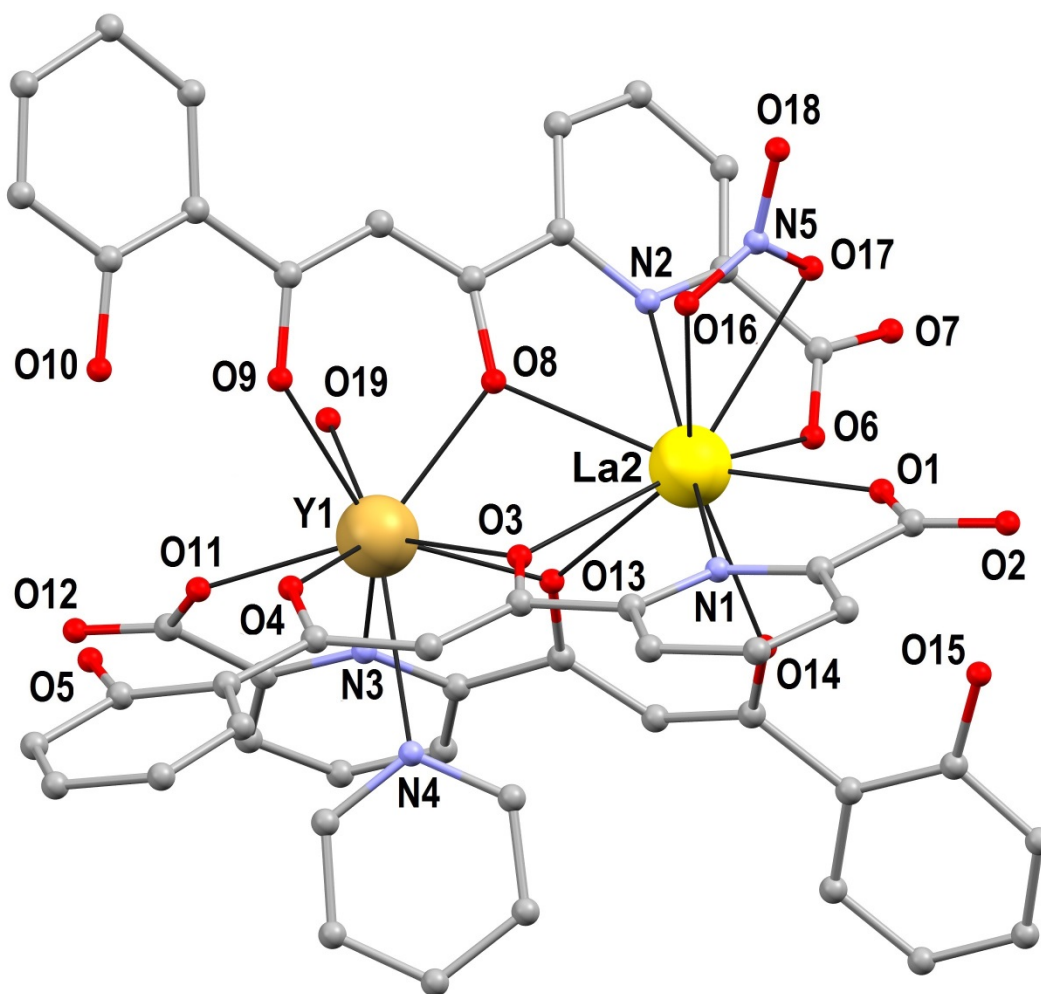

**Figure S16.** Representation of the molecular structure of  $[\text{LaY}(\text{HL})_2(\text{H}_2\text{L})(\text{NO}_3)(\text{py})(\text{H}_2\text{O})]$  (**7**). Only heteroatoms are labelled. Carbon atoms are in grey. Hydrogen atoms are not shown for clarity.

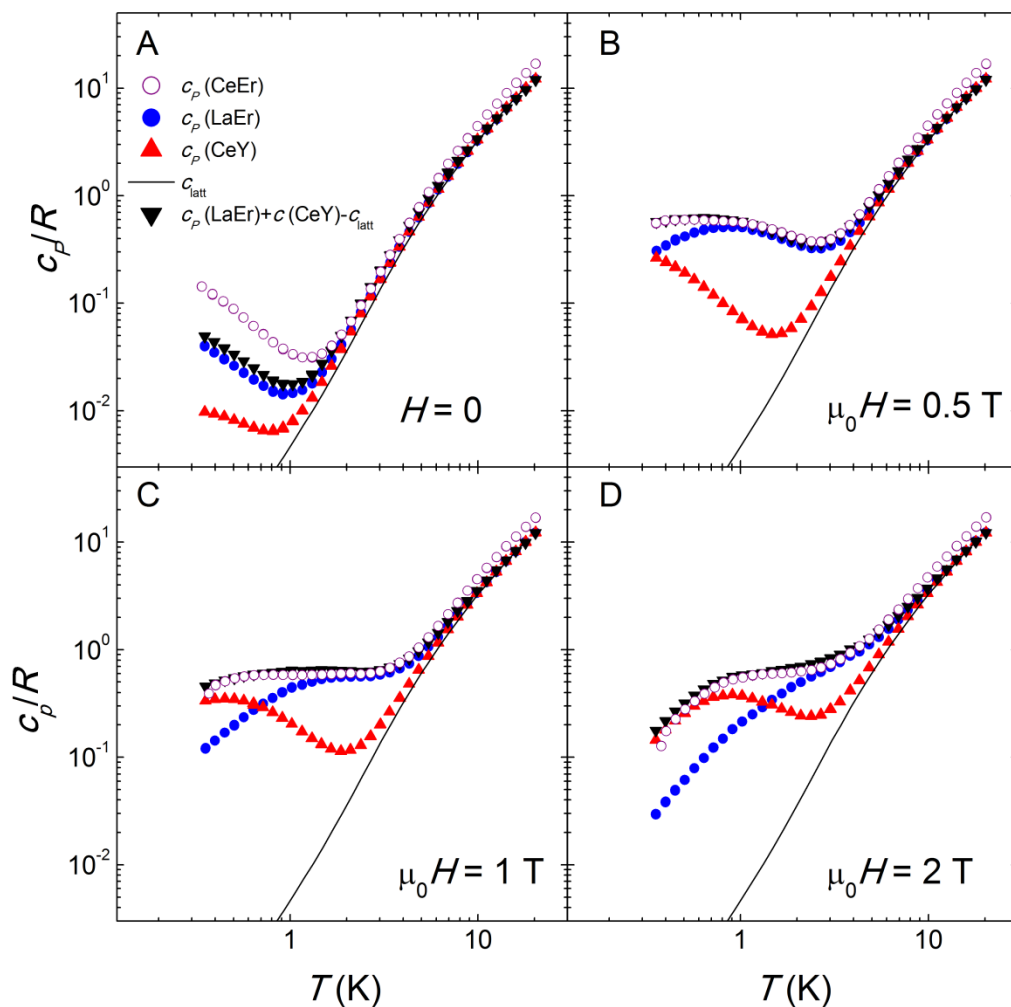

**Figure S17. Heat capacity of coupled qubits.** Specific heat of a powder sample of [CeEr] (1) measured at four different magnetic field values, compared to the specific heats of each of the two ions and to that of its sum.



Table S1. Crystallographic data for **1**, **4**, **5**, **6** and **7**.

| Compound                                                     | 1·5py                                                               | 4·5.5py                                                                   | 5·5py                                                               | 6·5py                                                                                                | 7·3py                                                              |
|--------------------------------------------------------------|---------------------------------------------------------------------|---------------------------------------------------------------------------|---------------------------------------------------------------------|------------------------------------------------------------------------------------------------------|--------------------------------------------------------------------|
| Formula                                                      | C <sub>75</sub> H <sub>60</sub> CeErN <sub>10</sub> O <sub>19</sub> | C <sub>77.5</sub> H <sub>62.5</sub> ErLaN <sub>10.5</sub> O <sub>19</sub> | C <sub>75</sub> H <sub>60</sub> CeN <sub>10</sub> O <sub>19</sub> Y | C <sub>75</sub> H <sub>57</sub> Ce <sub>0.70</sub> N <sub>10</sub> O <sub>19</sub> Y <sub>1.30</sub> | C <sub>65</sub> H <sub>50</sub> LaN <sub>8</sub> O <sub>19</sub> Y |
| FW, g/mol                                                    | 1712.71                                                             | 1751.04                                                                   | 1634.36                                                             | 1615.97                                                                                              | 1474.95                                                            |
| $\lambda$ , Å                                                | 0.71073                                                             | 0.7749                                                                    | 0.7749                                                              | 0.71073                                                                                              | 0.71073                                                            |
| crystal system                                               |                                                                     |                                                                           | monoclinic                                                          |                                                                                                      |                                                                    |
| space group                                                  |                                                                     |                                                                           | <i>P</i> 2 <sub>1</sub> / <i>c</i>                                  |                                                                                                      |                                                                    |
| <i>a</i> , Å                                                 | 14.5502(3)                                                          | 14.5226(11)                                                               | 14.450(3)                                                           | 14.4500(10)                                                                                          | 14.465(2)                                                          |
| <i>b</i> , Å                                                 | 15.8974(3)                                                          | 15.8712(11)                                                               | 15.827(3)                                                           | 15.867(2)                                                                                            | 15.9220(10)                                                        |
| <i>c</i> , Å                                                 | 35.5552(9)                                                          | 35.345(2)                                                                 | 35.468(6)                                                           | 35.483(3)                                                                                            | 35.520(3)                                                          |
| $\beta$ , deg                                                | 112.521(2)                                                          | 112.646(2)                                                                | 112.707(6)                                                          | 110.535(7)                                                                                           | 111.570(10)                                                        |
| <i>V</i> , Å <sup>3</sup>                                    | 7597.1(3)                                                           | 7518.6(9)                                                                 | 7483(2)                                                             | 7618.5(13)                                                                                           | 7607.8(13)                                                         |
| <i>Z</i>                                                     | 4                                                                   | 4                                                                         | 4                                                                   | 4                                                                                                    | 4                                                                  |
| $\rho_{\text{cal}}$ , g/cm <sup>3</sup>                      | 1.497                                                               | 1.546                                                                     | 1.451                                                               | 1.409                                                                                                | 1.288                                                              |
| $\mu$ , mm <sup>-1</sup>                                     | 1.765                                                               | 2.176                                                                     | 1.002                                                               | 1.474                                                                                                | 1.380                                                              |
| <i>T</i> , K                                                 | 150(2)                                                              | 100(2)                                                                    | 100(2)                                                              | 150(2)                                                                                               | 150(2)                                                             |
| unique reflections                                           | 12933                                                               | 14111                                                                     | 8403                                                                | 7964                                                                                                 | 9231                                                               |
| parameters / restraints                                      | 940 / 206                                                           | 1006 / 371                                                                | 1097 / 697                                                          | 932 / 347                                                                                            | 923 / 559                                                          |
| <i>wR</i> <sub>2</sub> [all data]                            | 0.1208                                                              | 0.2003                                                                    | 0.1650                                                              | 0.2721                                                                                               | 0.2334                                                             |
| <i>R</i> <sub>1</sub> (all data)                             | 0.1170                                                              | 0.0932                                                                    | 0.0779                                                              | 0.1739                                                                                               | 0.1576                                                             |
| <i>wR</i> <sub>2</sub> [ <i>I</i> > 2 $\sigma$ ( <i>I</i> )] | 0.1101                                                              | 0.1959                                                                    | 0.1515                                                              | 0.2243                                                                                               | 0.1968                                                             |
| <i>R</i> <sub>1</sub> [ <i>I</i> > 2 $\sigma$ ( <i>I</i> )]  | 0.0569                                                              | 0.0838                                                                    | 0.0583                                                              | 0.0973                                                                                               | 0.0853                                                             |
| <i>S</i> [all data]                                          | 0.926                                                               | 1.173                                                                     | 1.015                                                               | 1.022                                                                                                | 1.000                                                              |

CCDC numbers; 973881-973885 for compounds **1**, **4**, **5**, **6** and **7**, respectively.

Table S2. Selected bond distances (Å) and angles (°) of the structures of **1**, **4**, **5**, **6** and **7**.

| compound    | 1-5py<br>(Ln1=Er, Ln2=Ce) | 4-5.5py<br>(Ln1=Er, Ln2=La) | 5-5py<br>(Ln1=Y, Ln2=Ce) | 6-5py<br>(Ln1=Y, Ln2 = Ce / Y) | 7-3py<br>(Ln1=Y, Ln2=La) |
|-------------|---------------------------|-----------------------------|--------------------------|--------------------------------|--------------------------|
| Ln1–O4      | 2.312(5)                  | 2.313(7)                    | 2.319(6)                 | 2.306(10)                      | 2.336(8)                 |
| Ln1–O11     | 2.317(5)                  | 2.314(7)                    | 2.323(6)                 | 2.301(11)                      | 2.308(8)                 |
| Ln1–O8      | 2.329(6)                  | 2.339(7)                    | 2.332(6)                 | 2.302(12)                      | 2.335(8)                 |
| Ln1–O19     | 2.392(6)                  | 2.405(8)                    | 2.401(6)                 | 2.444(10)                      | 2.426(9)                 |
| Ln1–O9      | 2.400(5)                  | 2.396(7)                    | 2.397(6)                 | 2.355(11)                      | 2.401(8)                 |
| Ln1–O3      | 2.401(5)                  | 2.395(7)                    | 2.396(5)                 | 2.393(11)                      | 2.415(9)                 |
| Ln1–O13     | 2.425(5)                  | 2.412(6)                    | 2.423(6)                 | 2.416(12)                      | 2.423(8)                 |
| Ln1–N3      | 2.447(6)                  | 2.439(8)                    | 2.443(7)                 | 2.413(14)                      | 2.463(10)                |
| Ln1–N4      | 2.652(7)                  | 2.665(9)                    | 2.674(8)                 | 2.675(14)                      | 2.691(10)                |
| Ln2–O6      | 2.458(5)                  | 2.469(7)                    | 2.448(6)                 | 2.406(17) / 2.47(5)            | 2.450(9)                 |
| Ln2–O14     | 2.460(5)                  | 2.474(7)                    | 2.453(6)                 | 2.461(16) / 2.33(5)            | 2.474(9)                 |
| Ln2–O1      | 2.480(5)                  | 2.503(7)                    | 2.456(6)                 | 2.380(18) / 2.53(5)            | 2.488(10)                |
| Ln2–O13     | 2.534(5)                  | 2.551(7)                    | 2.518(6)                 | 2.576(15) / 2.34(4)            | 2.575(9)                 |
| Ln2–O8      | 2.568(5)                  | 2.574(7)                    | 2.550(6)                 | 2.545(16) / 2.49(5)            | 2.586(8)                 |
| Ln2–O16     | 2.597(6)                  | 2.642(8)                    | 2.608(6)                 | 2.474(17) / 2.66(5)            | 2.642(10)                |
| Ln2–N2      | 2.609(7)                  | 2.639(9)                    | 2.621(7)                 | 2.560(19) / 2.65(5)            | 2.605(11)                |
| Ln2–O3      | 2.679(5)                  | 2.687(7)                    | 2.677(5)                 | 2.688(15) / 2.53(5)            | 2.707(8)                 |
| Ln2–N1      | 2.722(6)                  | 2.745(9)                    | 2.732(6)                 | 2.711(17) / 2.70(6)            | 2.753(11)                |
| Ln2–O17     | 2.843(7)                  | 2.774(10)                   | 2.812(7)                 | 2.87(2) / -                    | 2.807(11)                |
| Ln1...Ln2   | 3.8505(6)                 | 3.8572(7)                   | 3.8516(11)               | 3.879(10)/ 3.69(4)             | 3.8693(14)               |
| Ln1–O3–Ln2  | 98.43(18)                 | 98.6(2)                     | 98.63(18)                | 99.4(5) / 97.0(12)             | 98.0(3)                  |
| Ln1–O8–Ln2  | 103.6(2)                  | 103.4(3)                    | 104.1(2)                 | 106.2(5) / 100.7(9)            | 103.6(3)                 |
| Ln1–O13–Ln2 | 101.9(2)                  | 102.0(2)                    | 102.4(2)                 | 101.9(5) / 101.7(14)           | 101.4(3)                 |
